# Supplementary material
Source: Springer Nature journal article supplement (http://www.springermedizin.de/resource/supplementary/12888_2008_635_MOESM1_ESM.pdf/9478134)

**Item****Mean (SD)****Distribution**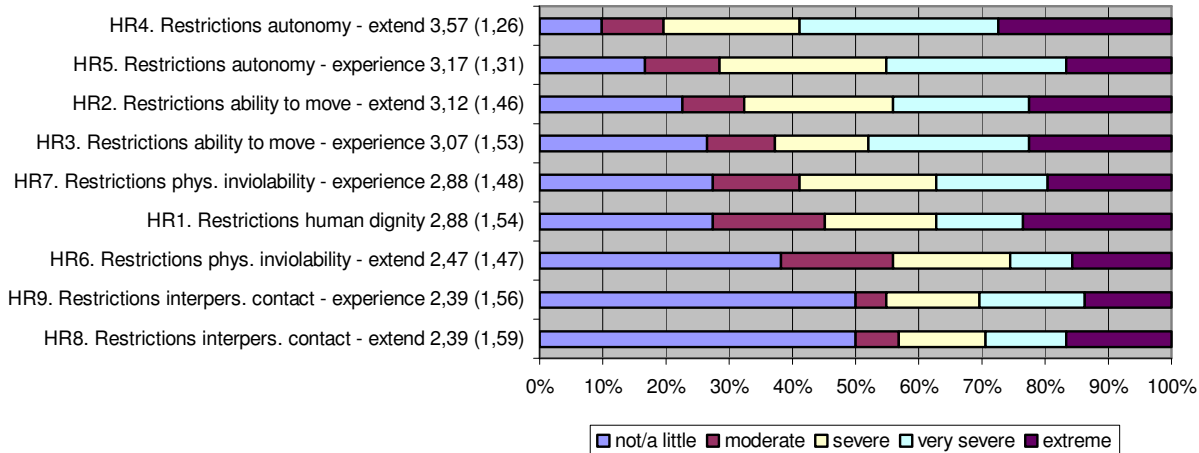

Supplement: MOESM1 [file 9478134]
